# Supplementary material
Source: publisher site journal article supplement (https://www.dovepress.com/article/471004)
Supplement: Supplementary file 1 [file get_supplementary_file.php]

**Supplementary Table S1.** Comparison of the knowledge scores according to surgery.

|  | Surgery | No surgery | P |
| --- | --- | --- | --- |
| K1. Do you know that varicocele is a vascular disease? | 2 (2-2) | 0 (0-2) | <0.001 |
| K2. Do you know that vigorous exercise or prolonged standing can worsen varicocele? | 2 (2-2) | 0 (0-1) | <0.001 |
| K3. Do you know that varicocele is more common on the left side? | 2 (2-2) | 0 (0-0) | <0.001 |
| K4. Do you know that varicocele can present as a mass or nodular lesion? | 2 (2-2) | 0 (0-1) | <0.001 |
| K5. Do you know that varicocele can affect the volume of the ipsilateral testis in adolescents? | 2 (1-2) | 0 (0-0) | <0.001 |
| K6. Do you know that varicocele can affect the quantity and quality of sperm in adolescents and even cause male infertility? | 2 (1-2) | 0 (0-0) | <0.001 |
| K7. Do you know that ultrasound is the preferred diagnostic method for varicocele? | 2 (1-2) | 0 (0-0) | <0.001 |
| K8. Do you know that mild varicocele does not require surgical treatment or can be managed conservatively? | 2 (2-2) | 0 (0-0) | <0.001 |
| K9. Do you know the various surgical methods for varicocele? | 2 (1-2) | 0 (0-0) | <0.001 |
| K10. Do you know the complications of varicocele surgery? | 1 (0-2) | 0 (0-0) | <0.001 |
| K11. Do you know the benefits of successful varicocele surgery, including increased volume of the ipsilateral testis and improvement in sperm quality and quantity? | 2 (2-2) | 0 (0-0) | <0.001 |

**Supplementary Table S2.** Comparison of the attitude scores according to surgery.

|  | Surgery | No surgery | P |
| --- | --- | --- | --- |
| A1. I believe that varicocele must be treated as early as possible. | 5 (5-5) | 1 (1-4) | <0.001 |
| A2. I believe that varicocele has a significant impact on my life. | 5 (5-5) | 1 (1-1) | <0.001 |
| A3. I believe that varicocele is a relatively sensitive but not very serious disease, and if there are no obvious discomforts, I will not actively seek medical treatment. | 3 (1-5) | 1 (1-1) | <0.001 |
| A4. I believe that surgery is the most effective method for treating severe varicocele patients. | 5 (5-5) | 1 (1-3) | <0.001 |
| A5. I believe that varicocele may recur after surgery, and the recurrence rate is significantly associated with the surgical method used. | 5 (5-5) | 1 (1-3) | <0.001 |
| A6. I believe that correcting my own behavior can effectively alleviate the symptoms of varicocele. | 5 (4-5) | 5 (1-5) | 0.003 |

**Supplementary Table S3.** Comparison of the practice scores according to surgery.

|  | Surgery | No surgery | P |
| --- | --- | --- | --- |
| P1. I regularly undergo physical examinations, ultrasound scans, semen analysis, and other routine check-ups. | 3 (3-4) | 1 (1-3) | <0.001 |
| P2. I regularly undergo physical examinations, ultrasound scans, semen analysis, and other routine check-ups. | 3 (3-4) | 1 (1-2) | <0.001 |
| P3. I avoid prolonged walking and standing in my daily life; I will also avoid strenuous exercise. | 3 (3-4) | 1 (1-3) | <0.001 |
| P4. I abstain from smoking, alcohol, and spicy foods, and maintain a light diet. | 3 (4-5) | 1 (1-3) | <0.001 |
| P5. I abstain from smoking, alcohol, and spicy foods, and maintain a light diet. | 3 (2-5) | 1 (1-3) | <0.001 |
| P6. I proactively learn about varicocele-related knowledge. | 3 (3-5) | 1 (1-3) | <0.001 |
